1 **Active and machine learning-based approaches to rapidly enhance microbial**  
2 **chemical production**

3 Prashant Kumar<sup>a,d,1</sup>, Paul A. Adamczyk<sup>a,1</sup>, Xiaolin Zhang<sup>a,1</sup>, Ramon Bonela  
4 Andrade<sup>a</sup>, Philip A. Romero<sup>b</sup>, Parameswaran Ramanathan<sup>c</sup>, and Jennifer L. Reed<sup>a</sup>

5  
6 **Classification:** Biological Sciences (major), Physical Sciences (minor)

7  
8 **Affiliations:**

9 <sup>a</sup>Department of Chemical and Biological Engineering, University of Wisconsin-Madison, 1415  
10 Engineering Dr., Madison, WI 53706

11 <sup>b</sup>Department of Biochemistry, University of Wisconsin-Madison, 440 Henry Mall, Madison, WI  
12 53706

13 <sup>c</sup>Department of Electrical and Computer Engineering, University of Wisconsin-Madison, 1415  
14 Engineering Dr., Madison, WI 53706

15 <sup>d</sup>Analysis Group, 111 Huntington Ave, Boston, MA 02199

16 <sup>1</sup>Authors contributed equally

17  
18 **Corresponding Authors:**

19 Parameswaran Ramanathan, 1415 Engineering Dr., 4615 Engineering Hall, Madison, WI 53706;  
20 1-608-263-0557; [parmesh.ramanathan@wisc.edu](mailto:parmesh.ramanathan@wisc.edu)

21  
22  
23 **Keywords:** Design of Experiments | Active Learning | Classification | Metabolic Engineering |  
24 Machine Learning | Support Vector Machine

25  
26 **Abbreviations:** leave-one-out cross-validation (LOOCV), maximum theoretical (MT), ribosome  
27 binding site (RBS), Support Vector Machine (SVM), upper confidence bound (UCB)

28  
29

30 **ABSTRACT**

31

32           In order to make renewable fuels and chemicals from microbes, new methods are required  
33 to engineer microbes more intelligently. Computational approaches, to engineer strains for  
34 enhanced chemical production typically rely on detailed mechanistic models (e.g.,  
35 kinetic/stoichiometric models of metabolism)—requiring many experimental datasets for their  
36 parameterization—while experimental methods may require screening large mutant libraries to  
37 explore the design space for the few mutants with desired behaviors. To address these limitations,  
38 we developed an active and machine learning approach (ActiveOpt) to intelligently guide  
39 experiments to arrive at an optimal phenotype with minimal measured datasets. ActiveOpt was  
40 applied to two separate case studies to evaluate its potential to increase valine yields and  
41 neurosporene productivity in *Escherichia coli*. In both the cases, ActiveOpt identified the best  
42 performing strain in fewer experiments than the case studies used. This work demonstrates that  
43 machine and active learning approaches have the potential to greatly facilitate metabolic  
44 engineering efforts to rapidly achieve its objectives.

45

46 **INTRODUCTION AND BACKGROUND**

47

48           In the near future, fuels and chemicals will have to be made renewably, and microbes are  
49 an attractive way to accomplish this due to their mild reaction conditions, product specificity, and  
50 product complexity. However, the number of commercial products made biologically is limited  
51 due to economic infeasibility and the incomplete understanding of biological systems resulting in  
52 numerous time-consuming iterations of the design-build-test cycle to optimize yields, titers, and/or  
53 productivities. While metabolic engineering aims to increase yield, titer, and/or productivities

54 through genetic manipulations, it is often difficult to identify which genetic modification(s) (e.g.,  
55 gene deletions, gene additions, and/or gene expression changes) are needed to improve  
56 biochemical production. To address this challenge, a variety of experimental and computational  
57 approaches have been developed in order to facilitate metabolic engineering efforts.

58 With a purely experimental approach, a large number of experiments may be needed to  
59 fully explore the potential genetic design space and find strategies that meet metabolic engineering  
60 objectives. Therefore, a number of high-throughput experimental approaches, including chemical  
61 genomics/BarSeq/TnSeq (that all quantify abundance of mutants in pooled libraries) (1)(2)(3),  
62 MAGE (Multiplex Automated Genome Engineering) (4), and TRMR (Trackable Multiplex  
63 Recombineering) (5) have been recently developed to improve metabolic engineering phenotypes,  
64 such as tolerance and chemical production. These experimental methods can rapidly generate large  
65 libraries of strains with high genetic diversity; however, these have only been applied to a relatively  
66 small number of microbial systems with metabolic engineering applications. Additionally, many  
67 of the techniques for identifying what genetic changes lead to desirable phenotypes rely on high-  
68 throughput screens or selections. Screening a large library of strains can be time consuming and  
69 requires a high-throughput method to monitor chemical production (e.g., colorimetric assays),  
70 which do not exist for many biochemicals, limiting the applicability of this approach. On the other  
71 hand, selections require a metabolic engineering objective connected to cellular growth or fitness.  
72 Such selections have been used to improve tolerance (5), but it is more challenging to use them to  
73 find mutations that lead to greater metabolite production. Addressing these issues, experimental  
74 approaches such as multivariate modular metabolic engineering (MMME), which separates  
75 metabolic pathways into smaller modules that are varied simultaneously, can significantly reduce  
76 the design space to obviate the need for high-throughput screens. However, in doing so, valuable

77 information is potentially lost and MMME still requires a semi-trial-and-error combinatorial  
78 construction of strains on the order of 10s, relying on human intelligence to deconvolute possibly  
79 complex, nonlinear interactions from sparse datasets to inform the next design (6, 7) Even so,  
80 most metabolic engineering projects still use a rational, iterative, trial-and-error approach that  
81 increases precursor and cofactor availability, alleviates bottlenecks, reduces flux through  
82 competing pathways, and expresses enzymes in biosynthesis pathways in order to increase desired  
83 production rate, product yield, or product titer.

84         Along with the experimental methods, a multitude of computational methods have been  
85 used to study microbial metabolic and/or regulatory networks and identify the genetic  
86 interventions needed to increase production of desired chemicals from low-cost substrates. These  
87 computational methods rely on mechanistic models (including genome-scale metabolic, kinetic,  
88 and regulatory models) or statistical models. Computational methods like OptKnock (8),  
89 SimOptStrain (9), and OptORF (10) rely on a stoichiometric, genome-scale, metabolic model to  
90 identify gene knockout and/or gene addition strategies that couple growth and metabolite  
91 production to enhance biochemical yields using experimental selections. Additionally, OptORF  
92 can also use integrated metabolic and transcriptional regulatory models to identify strategies  
93 involving metabolic and transcription factor gene knockouts and metabolic gene over-expression  
94 (10). However, reconstructing a microbe's transcriptional regulatory network is currently a major  
95 challenge and such integrated models exist only for well-studied organisms (11)(12)(13).  
96 Alternatively, kinetic models, which are much more detailed than stoichiometric metabolic  
97 models, can be used to increase flux through a pathway (14)(15)(16)(17)(18). However, due to the  
98 complexity of biological systems and incomplete datasets, there is much uncertainty attached to  
99 parameters within kinetic models. To address this, computational workflows such as ORACLE

100 and iSCHRUNK are being developed that utilize kinetic models, metabolic control analysis, and  
101 machine learning principles to minimize kinetic parameter uncertainty to suggest engineering  
102 strategies in the absence of complete information (19, 20). Nevertheless, these kinetic models  
103 require costly, time-consuming, and complex datasets (e.g., fluxomic, proteomic, and  
104 metabolomic), as well as a thorough understanding of substrate-level regulation, to accurately  
105 parameterize them, limiting kinetic modeling to well-studied organisms.

106 In contrast to mechanistic models, which often require large datasets to build them,  
107 statistical models can be used instead. Design-of-experiments tools, such as JMP (21) and  
108 DoubleDutch (22), can be used to design an initial set of experiments that evaluate the impacts of  
109 genetic mutations on desired metabolic engineering objectives. However, design-of-experiments  
110 tools often lack capabilities to use these initial experimental results to design the next set of  
111 experiments. Recently, machine learning approaches have been used to optimize gene expression  
112 levels to enhance metabolic flux through desired pathways. Lee and colleagues used a categorical  
113 log-linear regression model to predict how different promoters, used to drive expression of  
114 biosynthetic genes, impacted violacein titers (23). Farasat et al., in addition to their mechanistic  
115 kinetic model, used non-mechanistic models (i.e., a geometric and two statistical linear regression  
116 models) to predict how different ribosome binding sites (RBSs), controlling expression of three  
117 different biosynthesis genes, affected neurosporene (14). While these non-mechanistic models  
118 could accurately predict the performance for new combinations of previously tested RBSs or  
119 promoters (referred to as exploration), they were unable to predict the performance of gene  
120 expression constructs containing new RBSs or promoters (referred to as extrapolation).

121 Here, we developed an active and machine learning-based approach to design gene  
122 expression constructs for metabolic engineering—ActiveOpt—that overcomes many of the

123    aforementioned drawbacks. Although this is the first reported study that uses active learning-in  
124    metabolic engineering, active learning has been previously used in a wide range of other  
125    applications (24),(25),(26),(27),(28),(29),(30). ActiveOpt integrates computational and  
126    experimental efforts to improve metabolic engineering objectives using substantially fewer and  
127    simpler experiments (e.g., measuring biochemical yield or productivity) than many state-of-the-  
128    art approaches. ActiveOpt combines active and machine learning techniques without the need for  
129    detailed mechanistic models of the underlying metabolic and regulatory networks or a large initial  
130    experimental dataset. ActiveOpt guides the search for effective genetic engineering strategies  
131    using a machine learning classifier with simple inputs (e.g., predicted RBS strengths) constructed  
132    from at least two experimental results. As more results from new experiments become available,  
133    a classifier is refined to improve the selection of the next set of experiments. This cycle between  
134    classifier refinement, biochemical yield or productivity prediction, and experimental testing stops  
135    when either the metabolic engineering objective stops improving substantially, or a maximum  
136    number of experiments has been performed.

137            In this study, we show how ActiveOpt identified optimal combinations of genes and RBSs  
138    needed to increase biochemical yields or productivities for two different metabolic engineering  
139    case studies. Specifically, in the two case studies, we show that a simple machine learning classifier  
140    can accurately make qualitative predictions of product yield (i.e., low or high yield) from gene  
141    choices and RBS strength predictions (31),(32) using very few experiments, without requiring a  
142    detailed mechanistic model. Second, we show that ActiveOpt identifies combinations of RBSs and  
143    genes with the highest valine yields and neurosporene productivities in fewer experiments than a  
144    random trial-and-error approach. Third, four additional combinations of gene expression  
145    constructs predicted by ActiveOpt to have high valine yields were experimentally verified after

146 prediction from ActiveOpt. Finally, we show that ActiveOpt can be used to predict the outcomes  
147 of both exploration and extrapolation experiments, indicating that new combinations of previously  
148 tested and un-tested gene expression constructs can be selected in the experimental design process.  
149 Together, these results show the potential effectiveness of using ActiveOpt for metabolic  
150 engineering applications.

## 151 **RESULTS**

152

153 An active learning and machine learning approach (ActiveOpt) for designing experiments  
154 was developed and applied to two metabolic engineering cases studies, one of which is reported  
155 for the first time here. We evaluated the accuracy of a machine learning classifier to predict valine  
156 yields from RBS strength estimates—the same classifier used by ActiveOpt. Although most of the  
157 experimental dataset for this case study was generated without using ActiveOpt, no knowledge of  
158 the experiments or valine production except for the pathway was used to evaluate ActiveOpt's  
159 performance. ActiveOpt's performance at identifying the genetic parts that maximize yield or  
160 productivity in the fewest possible experiments was evaluated using three different methods for  
161 selecting experiments. Four new combinations of previously tested RBSs (i.e., exploration  
162 experiments) were suggested by ActiveOpt and tested experimentally; experimental results for  
163 these four new combinations were not available when ActiveOpt was used to make the prediction.  
164 Similarly, ActiveOpt was applied to enhance neurosporene productivity in *E. coli* using data from  
165 previously published experiments (14), and RBSs not used during ActiveOpt training (i.e.,  
166 extrapolation experiments) were selected to improve neurosporene productivity.

### 167 **Metabolic Engineering of *E. coli* for Valine Production**

168

169 Valine is an amino acid widely used as a nutritional supplement in several industries with  
170 a demand of about 500 tons annually (33). Amongst engineered *E. coli* valine production strains,  
171 the highest reported elemental carbon yield is 39% supplied C converted to valine (34); however,  
172 the strain requires supplementation with yeast extract, acetate, leucine, isoleucine, and D-  
173 pantothenate. Our goal was to engineer an *E. coli* strain with higher valine yields but without  
174 complex media requirements. Plasmids expressing valine biosynthesis and exporter genes (either  
175 *ilvBN\*DE*, *ilvIH\*C-ygaZH*, or *ilvIH\*C\*-ygaZH*, Figure 1) were designed using rational  
176 approaches, such as performing carbon balances to identify bottlenecks, using engineered  
177 enzymes, and identifying trends and testing systems-level hypotheses based on collected data.  
178 However, computational approaches were not used to design experiments. The two plasmid  
179 backbones, promoters, gene number, and order were fixed throughout the study with variations  
180 allowed for one gene (*ilvC* or *ilvC\**) and individual enzyme RBS strengths. A total of 39 plasmids  
181 were constructed and tested in 89 pairwise combinations before the best strain was identified which  
182 achieved an elemental carbon yield of 45% (or 54.7% of the maximum theoretical (MT) yield from  
183 glucose and acetate) in a defined minimal medium—the highest carbon yield reported in *E. coli*  
184 (Figure 2A). A total of 49 pairwise combinations were tested before one of the top strains (reaching  
185 ~90% of the best strains % of MTY); see supplementary information for details on the strategy  
186 employed for all 89 experiments.

## 187 **Machine Learning Algorithms Accurately Predict Valine Yields**

188

189 A total of 89 different valine production experiments were used to evaluate how well  
190 different machine learning classifiers could qualitatively predict valine yields (i.e., high or low  
191 yield) from RBS strengths and enzyme choices. All valine experiments were classified as either  
192 high yield (45 experiments) or low yield (44 experiments) using a fixed cutoff of 29% of the MT



193 yield of valine from glucose and acetate, so that a randomly chosen experiment has roughly a 50%  
194 chance of being high yield (Figure 2A). The input data used by the machine learning classifiers  
195 included the RBS strength predictions for 6 of the plasmid-expressed genes (i.e., the genes whose  
196 RBSs were varied across experiments, Figure 2B) and whether a native *ilvC* or mutated *ilvC\** (35)  
197 was used (encoding the NADPH and NADH-dependent enzymes, respectively). The resulting  
198 classifier's qualitative output was either a high or low valine yield prediction for a given  
199 experiment from a set of inputs.

200 To determine first if a linear Support Vector Machine (SVM) classifier (36) could  
201 accurately predict a valine experimental outcome correctly, we performed a leave-one-out cross-  
202 validation (LOOCV). In this case, the results from 88 experiments were used to train an SVM  
203 classifier and the classifier was used to predict the final experimental outcome. This was repeated  
204 89 times, with each experiment being left out of the initial training dataset used to build the  
205 classifier. The precision (the fraction of experiments that were predicted to be high yield which  
206 were found to have high yields experimentally) and recall (the fraction of high yield experiments  
207 that were predicted to be high yield) were calculated from this LOOCV analysis and are shown in  
208 Figure 2C. The precision and recall was 0.80 and 0.89, respectively, across these 89 different linear  
209 SVM classifiers. The agreement between machine learning model predictions and experimental  
210 outcomes was statistically significant ( $p\text{-value} = 1.35 \times 10^{-10}$  using a Fisher Exact Test).

211 Given the high level of accuracy for the linear classifiers, additional analyses were  
212 performed to evaluate whether fewer experiments could be used to train the classifier, if errors in  
213 predicted RBS strengths would impact accuracy, and if non-linear classifiers could improve  
214 predictions. In each case, the 89 possible experiments were randomly assigned to one of eight folds  
215 (or groups), with each fold including ~11 experiments. Each fold was used independently as a

216 training set to build a classifier, which was used to predict the outcomes for experiments in the  
217 seven other folds. The precision and recall values were calculated using predictions from all eight  
218 independent classifiers. This inverse eight-fold cross-validation was then repeated 1,000 different  
219 times and the resulting precision and recall values were averaged. When the number of  
220 experiments used to train the classifiers was lowered from 88 to ~11, the average precision (0.72)  
221 and recall (0.76) across 1000 inverse eight-fold cross-validations reduced only slightly (Figure  
222 2C). Additional fold sizes were also investigated, containing between ~5 and ~45 experiments,  
223 with precision ranging between 0.67 and 0.79 and recall ranging between 0.68 and 0.87  
224 (Supplementary Figure S1). Since the RBS Calculator (31) used to calculate the translation  
225 initiation rate may be inaccurate, it could potentially produce erroneous classifier input data. To  
226 evaluate the impact of potential errors in RBS strength predictions, the calculated RBS strength  
227 (31) was randomly changed up to +/- 20% for each of the 6 genes whose RBS sequence was varied.  
228 Once again, 1000 inverse eight-fold cross-validations were generated (by randomly assigning ~11  
229 experiments to one of eight folds) and the precision and recall were calculated across all eight  
230 folds. From this analysis, 20% errors in the predicted RBS strengths by the RBS calculator did not  
231 significantly affect the precision and recall rates (Figure 2C). Finally, a non-linear polynomial  
232 classifier was tested to see if it could improve machine learning model predictions, but the results  
233 were similar to the linear classifier with an average precision of 0.66 and recall of 0.66 (Figure  
234 2C). While precision and recall were not found to be very sensitive to fold-size, RBS errors, or  
235 classifier type, the precision and recall were sensitive to the cutoff used to classify experiments as  
236 high/low yield. In this case, the precision and recall of the classifier decreased as the fraction of  
237 experiments that were classified as high yield decreased (Supplementary Figure S1), since there  
238 are fewer high yield cases to learn from. Hence, we proceeded to use a linear SVM classifier, with

239 a cutoff that results in proportionately high and low yield cases, and without any RBS strength  
240 errors for all subsequent analyses.

## 241 **Comparison of Different Active Learning Approaches**

242

243 In total, 89 valine experiments were performed initially; however, if the study was repeated,  
244 could we identify the highest yielding strains in fewer, more intelligently selected experiments?  
245 To answer this, two active learning algorithms—ActiveOpt and Upper Confidence Bound (37)  
246 (UCB)—were applied to maximize valine yields in fewer experiments. For ActiveOpt, a small  
247 number of starting experiments (e.g., 2 or 3) were selected (Figure 3B) and an initial high/low  
248 yield cutoff was calculated (equal to the average of the highest and lowest yield across the set of  
249 selected experiments). Results from these experiments were used to train an initial linear SVM  
250 classifier (in the case of ActiveOpt) or a Gaussian process regression model (in the case of UCB).  
251 To identify the “next experiment” to be conducted and added to the training set used to generate  
252 subsequent classifiers and yield cutoffs (Figure 3A), we investigated three approaches with  
253 ActiveOpt (referred to as next-experiment selection approaches):

254 1) Closest-to-the-Hyperplane: with this approach, the closest experiment to the SVM  
255 hyperplane that is predicted to be high yield and has not been performed yet is chosen. This  
256 active learning approach could potentially generate accurate classifiers more quickly  
257 because experiments with the most uncertainty in their outcome (since they are close to the  
258 SVM hyperplane) are performed first.

259 2) Farthest-from-the-Hyperplane: with this approach, the farthest experiment from the  
260 hyperplane that is predicted to be high yield and has not been performed yet is chosen. This

261 active learning approach could potentially reach the highest yielding strains in the fewest  
262 number of experiments.

263 3) Farthest-then-Closest-to-the-Hyperplane: with this approach each next experiment  
264 alternates between either being farthest from the classifier's hyperplane or closest to the  
265 hyperplane on the high yield side. This active learning approach could attempt to achieve  
266 two objectives: reaching the highest yielding strains and building an accurate classifier.

267 We then compared ActiveOpt and UCB performances to a random trial-and-error approach (where  
268 the next experiment was randomly chosen from the set of remaining unperformed experiments).  
269 While ActiveOpt (Figure 3) and UCB are active learning algorithms, the random selection  
270 approach is not an active learning approach since current information is not used to inform  
271 selection of the next experiment.

272 To avoid biasing the comparisons by only selecting a single initial experiment, we ran the  
273 random scenario 1000 times, where each time an initial experiment was randomly chosen and then  
274 each of the 88 remaining experiments were randomly selected one by one. ActiveOpt was run with  
275 each of the 89 experiments used as the initial experiment for each of the three next-experiment  
276 selection approaches described above. At each iteration, ActiveOpt used the updated linear SVM  
277 classifiers from the previous round of data to select the next experiment (Figure 3A). ActiveOpt  
278 selected experiments to perform until no unperformed experiments were predicted by the SVM  
279 classifier to be high yield (i.e., all remaining potential experiments were predicted to be low yield).  
280 For the random selection approach, another experiment was performed until no additional  
281 experiments were available from the set of 89 experiments.

282 For each run, we first determined how many total experiments had to be performed before  
283 a satisfactory strain was found that had at least 95% of the highest observed valine yield across all

284 89 experiments (the highest observed elemental carbon yield was 45%, which is 54.7% of the MT  
285 yield). Figure 4A-C shows histograms of the total experiments needed to find a satisfactory strain  
286 across the ActiveOpt runs using different next-experiment selection approaches (see  
287 Supplementary Figure S2 for farthest-then-closest-to-the-hyperplane results). It is possible to  
288 identify that the farthest-from-the-hyperplane approach frequently finds a satisfactory valine  
289 production strain in fewer experiments than the other approaches (although farthest-then-closest-  
290 to-the-hyperplane and closest-to-the-hyperplane approaches are still an improvement over random  
291 sampling, a non-active learning approach). In 59 out of 89 cases, fewer than 10 expression  
292 constructs had to be tested before a satisfactory strain was found using the farthest-from-the-  
293 hyperplane approach compared to 475 out of 1000 or 41 out of 89 cases for the randomly chosen  
294 or closest-to-the-hyperplane approaches, respectively (Supplementary Table S3). This result  
295 shows that an active learning approach (where continually updated information is used to design  
296 the next experiment) can reduce the amount of time and effort needed to generate high yield strains.

297 Another way to evaluate the performance of the different approaches is to identify, at each  
298 iteration (i.e., new experiment selection), the highest observed yield across the subset of currently  
299 performed experiments. This highest observed yield can then be averaged across the 89 runs with  
300 different starting experiments. From Figure 4D, it can be seen that the farthest-from-the-  
301 hyperplane approach steeply increases the valine yield per experiment, as compared with other  
302 next-experiment selection approaches. The slope of the plot in Figure 4D can also be used as an  
303 indicator to decide whether to perform more experiments or not (e.g., after 7 experiments the curve  
304 plateaus for the farthest-from-the-hyperplane approach). The final classifiers (when no more  
305 experiments were predicted to be high yield) at the end of each of the 89 ActiveOpt runs were  
306 more accurate when closest-to-the-hyperplane approach was used (with average precision and

307 recall of 0.91 and 0.69 for all 89 experiments, respectively; and with standard deviations for  
308 precision and recall of 0.03 and 0.18, respectively), compared to the other next-experiment  
309 approaches (Supplementary Table S3).

310 In addition to using ActiveOpt with an SVM classifier, the UCB active and machine  
311 learning algorithm was evaluated, which allows tradeoffs between exploration and exploitation  
312 (37). UCB uses a regression model's predictions and confidence intervals to maximize an  
313 unknown function, in this case valine yield. Here, UCB used a Gaussian process regression model  
314 to predict valine yields, as compared to the SVM classifier used by ActiveOpt, which predicts  
315 high/low yield. Both UCB and ActiveOpt, on average, would take 8 experiments to find a  
316 satisfactory strain (Figure 2D). For a small number of valine experiments (between 3 and 6)  
317 ActiveOpt performs slightly better than UCB, while UCB performs slightly better than ActiveOpt  
318 after 8 experiments (Figure 2D). These results show that ActiveOpt and UCB can very accurately  
319 and efficiently identify high yield strains using results from a small number of experiments (e.g.,  
320 ~8 in the valine case), nearly an order of magnitude less than the total 89 experiments originally  
321 performed to achieve the same yield.

## 322 **Significant Features from Resulting Machine Learning Classifiers**

323

324 Machine learning classifiers can also be used to identify feature weights, a relative measure  
325 of the sensitivity of the linear SVM classifier output (in this case yield) to changes in feature value  
326 inputs (e.g., RBS strengths). Figure 4E shows the distribution of weights for the final classifiers  
327 (i.e., when no more high yield experiments are predicted for each of the 89 runs with unique initial  
328 experiments) when the farthest-from-the-hyperplane approach is used by ActiveOpt. From Figure  
329 4E, it can be seen that *ilvB* and *ilvD* have strong negative weights in most of the runs, while *ilvC\**,

330 *ilvN\** and *ygaZ* have positive weights. Increasing the RBS strengths of the genes with positive  
331 weights and decreasing the RBS strengths of the genes with negative weights should result in  
332 strains with high valine yields. Multinomial logistic regression (which fits binary outcomes to  
333 continuous input features) was also used to compare features from the valine dataset (Table 1). It  
334 can be seen that only the coefficients for *ilvB*, *ilvN\**, *ilvD* were significant, with a p-value less than  
335 0.05. However, the signs of the weights were similar to those predicted by ActiveOpt, further  
336 supporting the utility of the machine learning approach.

### 337 **Newly Designed Valine Experiments by ActiveOpt**

338

339 ActiveOpt suggested four new exploration experiments, using new plasmid combinations  
340 of previously tested RBSs, which were farthest from the hyperplane using a linear SVM classifier  
341 trained on all 89 previous experiments. Figure 4F shows that the valine yields in all four new  
342 experiments were correctly predicted to be high yield ( $\geq 29\%$  MT yield), with one combination  
343 being 53.4% MT yield, very close to the highest yield (54.7% MT yield) from the original 89  
344 experiments. Therefore, if distance from the hyperplane is indicative of valine yield, then no  
345 additional experiments, using combinations of existing plasmids (exploration), are predicted by  
346 ActiveOpt to increase yields above those found in the 93 experiments performed. Similarly, UCB  
347 predicted no untested plasmid pair combinations would have greater valine yields than those  
348 already tested.

### 349 **Application of ActiveOpt to Enhance Neurosporene Production**

350

351 Farasat et al. (14) recently reported a neurosporene productivity dataset in *E. coli* that used  
352 a designed RBS sequence library to vary expression of three neurosporene biosynthesis pathway  
353 genes (*crtEBI*) (Figure 5A). The authors initially designed 73 expression constructs for *crtEBI*,

354 transformed them into *E. coli*, and measured the specific neurosporene productivity (exploration  
355 experiments, Figure 5B). Next, a kinetic model (capable of extrapolating designs) was built for the  
356 24 elementary reactions in the neurosporene biosynthesis pathway to design 28 new expression  
357 constructs (extrapolation experiments), increasing neurosporene productivity from 196.3 to a  
358 maximum of 286  $\mu\text{g/gCDW/hr}$ .

359 This initial exploration dataset was used by ActiveOpt to test whether the most productive  
360 strains could be identified in fewer than 73 experiments. Figure 5C shows the average highest  
361 observed neurosporene productivity as a function of the chosen number of exploration experiments  
362 for several next-experiment ActiveOpt approaches. In this case, ActiveOpt was run with each of  
363 the 73 exploration experiments performed by Farasat et al. as the initial experiment. This figure  
364 also indicates that ActiveOpt identified strains with at least 95% of the best productivity from the  
365 exploration experiments in much fewer experiments than the 73 experiments performed by Farasat  
366 and colleagues. On average, a satisfactory strain (with a productivity of  $>186.5 \mu\text{g/gCDW/hr}$ )  
367 would have been found with  $\sim 10$  experiments for the closest-to-the-hyperplane and farthest-then-  
368 closest-to-the-hyperplane approaches and  $\sim 13$  experiments for the farthest-from-the-hyperplane  
369 approach (Supplementary Table S4). Notably, ActiveOpt does not require any kinetic information  
370 to optimize expression constructs for the biosynthesis pathway. Furthermore, Farasat and  
371 colleagues found that high neurosporene productivity requires high *crtE* activity, agreeing with the  
372 final average ActiveOpt classifier weights of 1.07, -0.03, and 0.09 for *crtE*, *crtB*, and *crtI*,  
373 respectively, for the farthest-from-the-hyperplane approach (Supplementary Figure S3 and  
374 Supplementary Table S5).

375 The first 73 exploration experiments performed by Farasat et al. explored the design space  
376 for RBSs controlling neurosporene production. Using a kinetic model, the authors designed new



377 RBSs predicted to further increase neurosporene production resulting in 28 new extrapolation  
378 experiments (since the RBSs were previously untested). The 73 final ActiveOpt classifiers (when  
379 no more high productivity exploration experiments were predicted) generated from the exploration  
380 experiments were each used to choose an extrapolation experiment with the farthest-from-the-  
381 hyperplane approach. ActiveOpt was then allowed to continue selecting new extrapolation  
382 experiments, by updating the cutoff and classifier, until no remaining extrapolation experiments  
383 were predicted by ActiveOpt to have high productivity. The final recall for the extrapolation  
384 experiments across all 73 runs (when ActiveOpt was started with final classifiers from the  
385 exploration experiments) had an average of 0.70 and standard deviation of 0.17 (Figure 5D and  
386 Supplementary Table S4). Of the 73 ActiveOpt runs, 47 would have found the highest productivity  
387 extrapolation experiment ( $286 \mu\text{g/gCDW/hr}$ ), 58 would have found one of the top two  
388 productivities, and 70 would have found a satisfactory strain with  $>271 \mu\text{g/gCDW/hr}$  neurosporene  
389 productivity (Figure 5E). Slightly more runs identified a satisfactory strain when the closest-to-  
390 the-hyperplane and farthest-then-closest-to-the-hyperplane approaches were used with ActiveOpt  
391 (Supplementary Table S4). The average number of extrapolation experiments needed to find a  
392 satisfactory strain was 2, 4, and 6 when closest-to-the-hyperplane, farthest-then-closest-to-the-  
393 hyperplane, and farthest-from-the-hyperplane approaches were used, respectively (Supplementary  
394 Figure S4). This is substantially less than the total 28 extrapolation experiments performed by  
395 Farasat and colleagues. Together, these results show that ActiveOpt can be applied to extrapolation  
396 experiments involving previously untested RBSs.

## 397 **DISCUSSION**

398

399 Machine learning uses statistical models to identify non-intuitive patterns between input  
400 features and experimental outcomes and has been applied to a wide range of fields; however, its

401 use in metabolic engineering has been limited. We evaluated whether machine learning could be  
402 used in an active learning framework (ActiveOpt) to accelerate development of biochemical  
403 production strains. ActiveOpt was applied to two separate datasets, a published dataset for  
404 neurosporene productivity and a new valine dataset reported here—the latter of which achieved  
405 the highest reported *E. coli* valine yield in a defined minimal medium. We showed that a linear  
406 classifier is able to qualitatively predict yields with high precision and recall using only predicted  
407 RBS strengths and gene choices (*ilvC* or *ilvC\**) as inputs. When this machine learning classifier  
408 was integrated into an active learning framework, satisfactory strains could be identified in  
409 significantly fewer design iterations than the original experimental studies. In particular, there does  
410 not seem to be a need for a non-linear classifier.

411         ActiveOpt is a method for efficiently exploring the design space to identify the subset of  
412 gene expression constructs which give rise to strains with higher yields or productivities. Since  
413 ActiveOpt does not rely on high-throughput selections or screens to identify these optimal  
414 expression constructs, this approach could be applied to enhance production of a larger number of  
415 biochemical targets. ActiveOpt has low upfront requirements, in terms of data and understanding  
416 of the metabolic pathway, only requiring predicted RBS strengths and measured  
417 yields/productivities. Since ActiveOpt does not rely on detailed mechanistic or kinetic models it  
418 does not require large, complex ‘omics datasets to parameterize them. An important advantage of  
419 ActiveOpt, relative to most other supervised machine learning applications, is its ability to predict  
420 experimental outcomes outside the training set design space (i.e., extrapolation experiments) to  
421 achieve better results.

422         ActiveOpt also identifies the features that most significantly affect the metabolic  
423 engineering objective (in our case RBS strengths), which might be useful in further shrinking the

424 design space for future studies on a similar pathway or narrowing the focus of the current study.  
425 Feature selection can direct our attention to portions of the pathways where a more detailed model  
426 or mechanistic insights into the system might be necessary to fine tune yields/productivities.  
427 Analysis of these features was useful in both case studies, and in the neurosporene study the feature  
428 weights for the genes found by ActiveOpt were consistent with conclusions drawn from a more  
429 detailed kinetic model of the pathway.

430         This work shows how machine and active learning can be used to successfully streamline  
431 the development of high biochemical production strains. While machine learning models worked  
432 well for the two case studies evaluated in this work, it is possible that optimizing flux through  
433 other metabolic pathways might require other types of classifiers and/or regressors to achieve  
434 accurate predictions. Future work should evaluate ActiveOpt's performance on other metabolic  
435 engineering targets and investigate whether design decisions can include other types of gene  
436 expression control elements (e.g., promoters and terminators). The performance and validation of  
437 ActiveOpt opens avenues for its implementation to guide projects with a defined parameter design  
438 space from inception to outcome. While not explicitly tested here, this would be a true test for  
439 method robustness and would validate machine learning algorithms as a useful tool for metabolic  
440 engineers.

441

## 442 **METHODS**

443

### 444 **ActiveOpt: Active Learning using a SVM classifier**

445

446         ActiveOpt uses a SVM classifier (36) to perform active learning (25). The built-in  
447 MATLAB SVM classifier function ('svmtrain') was used for binary classification ("high" and

448 “low”) of biochemical yield or productivity data obtained from experiments. For both the valine  
449 and neurosporene cases the predicted RBS strengths for the individual genes in the biosynthesis  
450 pathways were used as features for classification and the set of all possible RBS strength values  
451 defines the feature space. For the valine dataset, if a gene was not included on a plasmid (i.e., *ilvC*  
452 or *ilvC\**) then the associated RBS strength was set to zero. The predicted RBS strengths (from the  
453 RBS Calculator (31)) were standardized for each gene by subtracting the mean RBS strength and  
454 dividing by the standard deviation across all the values in the design space.

455 A machine learning classifier finds a decision boundary, a hyperplane in the  
456 multidimensional feature space, to predict whether a collection of feature values would result in  
457 either “high” or “low” yield/productivity. The linear SVM classifier requires experiments from  
458 each group be included in the training set. In the event that a fold was created that included  
459 experiments from only one group, then data from all other assigned folds were excluded from the  
460 analysis and the MATLAB ‘crossvalind’ function was used again to randomly assign all  
461 experiments to the specified number of folds. This random process was repeated for the inverse  
462 fold cross-validation until 1,000 appropriately assigned folds were found (i.e., each fold has both  
463 and high and low yield experiments).

464 ActiveOpt needs few starting data points to train the initial classifier and then ActiveOpt  
465 predicts all other experimental outcomes. For the initial set of experiments, ActiveOpt selects one  
466 experiment and then chooses another initial experiment from the available experiments which has  
467 maximum Euclidean distance in the feature space from the first chosen experiment (Figure 3A-B).  
468 This process of choosing initial experiments continues until the absolute difference between the  
469 maximum and the minimum yields/productivity is greater than a user-defined initial cutoff (5%  
470 MT yield was used for the valine dataset and 10  $\mu\text{g/gCDW/hr}$  was used for the neurosporene

471 dataset). These chosen initial experiments can be then labeled into two classes, “high” and “low”,  
472 based on their yield/productivity and the classifier is trained on these experiments and proposes  
473 subsequent experiments with predicted high chemical yield/productivity. The flowchart of the  
474 entire process is shown in Figure 3. The suggested subsequent experiment is the farthest or closest  
475 point on the “high” labeled side of the hyperplane, as certainty about the experimental outcome  
476 increases with distance from the decision boundary. After conducting the proposed experiment,  
477 the result is used to update the high/low cutoff used to classify all performed experiments (cutoff  
478 equals the average of the maximum and minimum yield/productivity across the previously selected  
479 experiments) and to train the next iteration’s SVM classifier. The SVM hyperplane might not  
480 change in each iteration as it depends on the support vectors. The process of suggesting  
481 experiments stops when there is no significant improvement in the yield (Figure 3C.i) or when no  
482 additional high yield/productivity experiments are predicted. Additionally, feature selection  
483 (Figure 3C.ii) can be performed by analyzing the weights of individual features. Classification  
484 using the MATLAB multinomial logistic regression function (mnrfit) was also performed on the  
485 valine dataset to identify the significance of each feature.

## 486 **Strains and plasmids**

487

488 To evaluate how expression of different valine biosynthesis and exporter genes (Figure 1)  
489 impacts valine production, a derivative of *E. coli* strain PYR003 (BW25113 *aceE::kan ΔgdhA*  
490 *ΔpoxB ΔdhA*) with genotype BW25113 *ΔaceEΔgdhAΔpoxBΔdhAΔrecA* (PYR003a) was used as  
491 a background strain. PYR003 produces high yields of pyruvate from glucose and acetate (0.75 g  
492 pyruvate/g substrate) (X. Zhang and J.L. Reed, unpublished data). The valine biosynthesis genes  
493 (*ilvBN\*DEIH\*C/C\**) and valine exporter (*ygaZH (38)*) genes were cloned onto two separate  
494 plasmids to allow combinatorial testing with varying expression levels. Valine production genes

495 were either cloned from the *E. coli* K-12 MG1655 chromosome (in the case of *ilvBDEIC* and  
496 *ygaZH*) or were generated via overlap extension PCR (in the case of *ilvC\**, *ilvN\**, and *ilvH\**). The  
497 *ilvC\** gene (containing mutations A71S, R76D, S78D, and Q110V and referred to previously as  
498 *ilvC*<sup>6E6-his6</sup> (35)) prefers NADH instead of NADPH as a cofactor. The *ilvN\** gene (containing  
499 mutations G20D, V21D, and M22F and referred to previously as *ilvN*<sup>mut</sup> (34)) and *ilvH\** gene  
500 (containing mutations G14D and S17F, referred to previously as *ilvH*<sup>G41A.C50T</sup> (34)) are feedback-  
501 resistant mutants of *ilvN* and *ilvH*, respectively. The pTrc99A plasmid backbone (39) was used to  
502 express *ilvBN\*DE*, while another plasmid backbone, pACYCtrc, was used to express *ilvC/C\**,  
503 *ilvIH\** and *ygaZH* (40).

504 Multiple RBS sequences were used to generate different expression levels for the valine  
505 production genes (see Supplementary Table S1 for plasmid details). Specifically, RBS sequences  
506 were taken from either: 1) *de novo* designs from the RBS Calculator (31); 2) published literature  
507 of characterized synthetic RBS sequences (41); 3) chromosomal RBS sequences upstream of the  
508 gene's genomic locus; or 4) RBS sequences already present on the plasmid backbones. RBS  
509 sequences generated by the RBS Calculator used the following input parameters: 1) Organism: *E.*  
510 *coli* K-12 MG1655; 2) free energy model v1.1; 3) 100 bp of the coding sequence; and 4) 20 bp  
511 upstream of the start codon.

## 512 **Media and culture conditions**

513

514 All valine yield experiments were performed in 250 mL, baffled shake flasks containing  
515 50 mL of MOPS-buffered minimal media (42) supplemented with 0.1 g/L sodium acetate, 2 g/L  
516 glucose, 100  $\mu$ g/L thiamine hydrochloride, 100 mg/L of ampicillin, and 34 mg/L of  
517 chloramphenicol. Electro-competent PYR003a cells were prepared, double electroporated with

518 two plasmid combinations, and incubated overnight at 37°C on Luria-Bertani broth (43) agar plates  
519 supplemented with 4 g/L glucose, 100 mg/L of ampicillin, and 34 mg/L of chloramphenicol.  
520 Subsequently, a minimum of two biological replicate colonies were picked for all experiments and  
521 sub-cultured in 10 mL of supplemented MOPS-buffered minimal media (as detailed above) for 24  
522 hours at 37°C in a shaker at 225 RPM. Cells were then centrifuged, washed, and used to inoculate  
523 the 250 mL flasks to a starting OD<sub>600</sub> of 0.01. Shake flasks were capped and wrapped with paraffin  
524 film to prevent evaporation and incubated for 48 hours. No isopropyl β-D-thiogalactopyranoside  
525 (IPTG) was added to the media, so transcription of the valine production genes from the plasmids  
526 was based on leaky expression

#### 527 **Glucose and valine quantification**

528

529 Prior to valine quantification, complete glucose utilization was verified for all experiments  
530 via an enzymatic assay (Glucose (GO) Assay Kit, Sigma-Aldrich) to ensure accurate yield  
531 calculations. Valine was quantified with a [1-<sup>13</sup>C]valine internal standard (Cambridge Isotope  
532 Laboratories) using an isotope-ratio method and gas chromatography-mass spectrometry (GC-MS)  
533 (44). A known amount of a [1-<sup>13</sup>C]valine was added to samples containing unlabeled valine, dried  
534 at 90°C, and derivatized with *N*-*tert*-butyl-dimethylsilyl-*N*-methyltrifluoroacetamide plus 1% *tert*-  
535 butyl-dimethylchlorosilane at 90°C for 30 minutes to increase volatility and thermal stability  
536 required for GC-MS analysis. Samples were then run on a single quadrupole GC-MS QP2010S  
537 (Shimadzu) in electron ionization mode equipped with an Rtx-5ms (Restek) low-bleed, fused-  
538 silica column for separation with helium as a carrier gas operating under linear velocity control  
539 mode with a split ratio of 0.50 and a column flow of 1.50 mL/min. The temperature program for  
540 valine separation began with holding the oven temperature at 100°C for 5 minutes, ramping up at  
541 25°C/min to 300°C, and holding for 5 minutes. Operating parameters included an injection

542 temperature of 240°C, ion source temperature of 260°C, interface temperature of 240°C, and a  
543 mass scan range of 100–450  $m/z$ . Then, an appropriate fragment (45) containing the labeled carbon  
544 from the internal standard was used to calculate the  $^{12}\text{C}/^{13}\text{C}$  ratio and, subsequently, the  
545 concentration of the sample after correcting for isotopic impurity of the internal standard and for  
546 natural abundance of  $^{13}\text{C}$  using a freely available software, IsoCor (46). This method was tested on  
547 samples with known concentrations of unlabeled valine ranging from 0.5 mM to 80 mM; predicted  
548 values were plotted against known values with a fit of  $y=0.9987x$  (with  $y=x$  being the most  
549 accurate). Measured valine yields were compared to the MT yield (0.644 g valine/g carbon source),  
550 the latter calculated from flux balance analysis (47) of the iJR904 *E. coli* genome-scale metabolic  
551 model (48) using the amounts of glucose (2 g/L) and acetate (0.072 g/L) present in the  
552 supplemented MOPS minimal medium.

553

554

## 555 **ACKNOWLEDGEMENTS**

556

557 This work was funded in by the Office of Science (BER), U.S. Department of Energy (DE-  
558 SC0008103), the U.S. Department of Energy Great Lakes Bioenergy Research Center (DOE BER  
559 Office of Science DE-FC02-07ER64494 and DE-SC0018409), and by a grant from the Keck  
560 Foundation.

## 561 **REFERENCES**

562

- 563 1. S. Bottoms, Q. Dickinson, M. McGee, L. Hinchman, A. Higbee, A. Hebert, J. Serate, D.  
564 Xie, Y. Zhang, J. J. Coon, C. L. Myers, R. Landick, J. S. Piotrowski, Chemical genomic



- 565 guided engineering of gamma-valerolactone tolerant yeast. *Microb. Cell Fact.* **17**, 5  
566 (2018).
- 567 2. J. M. Skerker, D. Leon, M. N. Price, J. S. Mar, D. R. Tarjan, K. M. Wetmore, A. M.  
568 Deutschbauer, J. K. Baumohl, S. Bauer, A. B. Ibáñez, V. D. Mitchell, C. H. Wu, P. Hu, T.  
569 Hazen, A. P. Arkin, Dissecting a complex chemical stress: chemogenomic profiling of  
570 plant hydrolysates. *Mol. Syst. Biol.* **9**, 674 (2013).
- 571 3. K. Patterson, J. Yu, J. Landberg, I. Chang, F. Shavarebi, V. Bilanchone, S. Sandmeyer,  
572 Functional genomics for the oleaginous yeast *Yarrowia lipolytica*. *Metab. Eng.* **48**, 184–  
573 196 (2018).
- 574 4. H. H. Wang, F. J. Isaacs, P. A. Carr, Z. Z. Sun, G. Xu, C. R. Forest, G. M. Church,  
575 Programming cells by multiplex genome engineering and accelerated evolution. *Nature*.  
576 **460**, 894–8 (2009).
- 577 5. N. R. Sandoval, J. Y. H. Kim, T. Y. Glebes, P. J. Reeder, H. R. Aucoin, J. R. Warner, R.  
578 T. Gill, Strategy for directing combinatorial genome engineering in *Escherichia coli*. *Proc.*  
579 *Natl. Acad. Sci. U. S. A.* **109**, 10540–5 (2012).
- 580 6. P. K. Ajikumar, W.-H. Xiao, K. E. J. Tyo, Y. Wang, F. Simeon, E. Leonard, O. Mucha, T.  
581 H. Phon, B. Pfeifer, G. Stephanopoulos, Isoprenoid pathway optimization for Taxol  
582 precursor overproduction in *Escherichia coli*. *Science*. **330**, 70–4 (2010).
- 583 7. B. W. Biggs, B. De Paepe, C. N. S. Santos, M. De Mey, P. Kumaran Ajikumar,  
584 Multivariate modular metabolic engineering for pathway and strain optimization. *Curr.*  
585 *Opin. Biotechnol.* **29**, 156–162 (2014).

- 586 8. A. P. Burgard, P. Pharkya, C. D. Maranas, Optknock: A bilevel programming framework  
587 for identifying gene knockout strategies for microbial strain optimization. *Biotechnol.*  
588 *Bioeng.* **84**, 647–657 (2003).
- 589 9. J. Kim, J. L. Reed, C. T. Maravelias, Large-Scale Bi-Level Strain Design Approaches and  
590 Mixed-Integer Programming Solution Techniques. *PLoS One.* **6**, e24162 (2011).
- 591 10. J. Kim, J. L. Reed, OptORF : Optimal metabolic and regulatory perturbations for  
592 metabolic engineering of microbial strains (2010).
- 593 11. S. Chandrasekaran, N. D. Price, Probabilistic integrative modeling of genome-scale  
594 metabolic and regulatory networks in Escherichia coli and Mycobacterium tuberculosis.  
595 *Proc. Natl. Acad. Sci. U. S. A.* **107**, 17845–50 (2010).
- 596 12. M. J. Herrgård, S. S. Fong, B. Ø. Palsson, Identification of genome-scale metabolic  
597 network models using experimentally measured flux profiles. *PLoS Comput. Biol.* **2**, e72  
598 (2006).
- 599 13. M. J. Herrgård, B.-S. Lee, V. Portnoy, B. Ø. Palsson, Integrated analysis of regulatory and  
600 metabolic networks reveals novel regulatory mechanisms in *Saccharomyces cerevisiae*.  
601 *Genome Res.* **16**, 627–35 (2006).
- 602 14. I. Farasat, M. Kushwaha, J. Collens, M. Easterbrook, M. Guido, H. H. M. Salis, H. Alper,  
603 G. Stephanopoulos, H. Alper, K. Miyaoku, G. Stephanopoulos, J. Apgar, D. Witmer, F.  
604 White, B. Tidor, A. Aswani, P. Bickel, C. Tomlin, J. Bailey, K. Baker, G. Mackie, A.  
605 Bassett, C. Tibbit, C. Ponting, J. Liu, J. Becker, O. Zelder, S. Häfner, H. Schröder, C.  
606 Wittmann, A. E. Borujeni, A. Channarasappa, H. H. M. Salis, R. Brewster, D. Jones, R.  
607 Phillips, N. Chang, C. Sun, L. Gao, D. Zhu, X. Xu, X. Zhu, J. Xiong, J. Xi, Y. Chen, P.

608 Liu, A. Nielsen, J. Brophy, K. Clancy, T. Peterson, C. Voigt, S. Cho, S. Kim, J. J. J. Kim,  
609 J. J. J. Kim, L. Cong, F. Ran, D. Cox, S. Lin, R. Barretto, N. Habib, P. Hsu, X. Wu, W.  
610 Jiang, L. Marraffini, C. Contador, M. Rizk, J. Asenjo, J. Liao, H. Conzelmann, D. Fey, E.  
611 Gilles, P. Coussement, J. Maertens, J. Beauprez, W. Van Belleghem, M. De Mey, R. Dahl,  
612 F. Zhang, J. Alonso-Gutierrez, E. Baidoo, T. Batth, A. Redding-Johanson, C. Petzold, A.  
613 Mukhopadhyay, T. Lee, P. Adams, S. Dasgupta, L. Fernandez, L. Kameyama, T. Inada,  
614 Y. Nakamura, A. Pappas, D. Court, Y. Dharmadi, K. Patel, E. Shapland, D. Hollis, T.  
615 Slaby, N. Klinkner, J. Dean, S. Chandran, J. Du, Y. Yuan, T. Si, J. Lian, H. Zhao, J. Du,  
616 W. Bai, H. Song, Y. Yuan, C. Engler, R. Gruetzner, R. Kandzia, S. Marillonnet, A. E.  
617 Borujeni, A. Channarasappa, H. H. M. Salis, K. Esvelt, H. Wang, D. Fell, S. Fendt, J.  
618 Buescher, F. Rudroff, P. Picotti, N. Zamboni, U. Sauer, M. Folichon, V. Arluison, O.  
619 Pellegrini, E. Huntzinger, P. Régnier, E. Hajnsdorf, S. Geggier, A. Vologodskii, D.  
620 Gibson, L. Young, R. Chuang, J. Venter, C. Hutchison, H. Smith, D. Goodman, G.  
621 Church, S. Kosuri, A. Gruber, R. Lorenz, S. Bernhart, R. Neuböck, I. Hofacker, P. Guye,  
622 Y. Li, L. Wroblewska, X. Duportet, R. Weiss, Y. Hao, Z. Zhang, D. Erickson, M. Huang,  
623 Y. Huang, J. Li, T. Hwa, H. Shi, C. Hyeon, D. Thirumalai, S. Johnson, M. Lindén, R.  
624 Phillips, B. Kholodenko, H. Westerhoff, H. Kilpinen, S. Waszak, A. Gschwind, S.  
625 Raghav, R. Witwicki, A. Orioli, E. Migliavacca, M. Wiederkehr, M. Gutierrez-Arcelus, N.  
626 Panousis, H. Kitano, S. Kosuri, D. Goodman, G. Cambray, V. Mutalik, Y. Gao, A. Arkin,  
627 D. Endy, G. Church, M. Lajoie, A. Rovner, D. Goodman, H. Aerni, A. Haimovich, G.  
628 Kuznetsov, J. Mercer, H. Wang, P. Carr, J. Mosberg, M. Lee, A. Aswani, A. Han, C.  
629 Tomlin, J. Dueber, T. Lo, C. Pickle, S. Lin, E. Ralston, M. Gurling, C. Schartner, Q. Bian,  
630 J. Doudna, B. Meyer, S. Lovett, P. Mali, L. Yang, K. Esvelt, J. Aach, M. Guell, J.

631 DiCarlo, J. Norville, G. Church, D. Mathews, J. Sabina, M. Zuker, D. Turner, J. Miller, S.  
632 Tan, G. Qiao, K. Barlow, J. Wang, D. Xia, X. Meng, D. Paschon, E. Leung, S. Hinkley,  
633 M. Monti, A. Smania, G. Fabro, M. Alvarez, C. Argaraña, T. Moon, C. Lou, A. Tamsir, B.  
634 Stanton, C. Voigt, V. Mutalik, J. Guimaraes, G. Cambray, C. Lam, M. Christoffersen, Q.  
635 Mai, A. Tran, M. Paull, J. Keasling, A. Arkin, A. Nielsen, T. Segall-Shapiro, C. Voigt, E.  
636 O'Brien, J. Lerman, R. Chang, D. Hyduke, B. Palsson, D. Oppenheim, C. Yanofsky, J.  
637 Quan, I. Saaem, N. Tang, S. Ma, N. Negre, H. Gong, K. White, J. Tian, E. Quandt, D.  
638 Deatherage, A. Ellington, G. Georgiou, J. Barrick, M. de Raad, S. Kooijmans, E.  
639 Teunissen, E. Mastrobattista, F. Ran, P. Hsu, C. Lin, J. Gootenberg, S. Konermann, A.  
640 Trevino, D. Scott, A. Inoue, S. Matoba, Y. Zhang, V. Rhodius, V. Mutalik, G. Rodrigo, T.  
641 Landrain, S. Shen, A. Jaramillo, H. Saito, C. Richardson, H. H. M. Salis, E. Mirsky, C.  
642 Voigt, H. H. M. Salis, N. Sandoval, J. J. J. Kim, T. Glebes, P. Reeder, H. Aucoin, J.  
643 Warner, R. Gill, C. Santos, W. Xiao, G. Stephanopoulos, S. Sharan, L. Thomason, S.  
644 Kuznetsov, D. Court, S. Sleight, B. Bartley, J. Lieviant, H. Sauro, S. Sleight, H. Sauro, K.  
645 Smallbone, H. Messiha, K. Carroll, C. Winder, N. Malys, W. Dunn, E. Murabito, N.  
646 Swainston, J. Dada, F. Khan, C. Smolke, P. Silver, M. Sneddon, J. Faeder, T. Emonet, K.  
647 Sneppen, S. Krishna, S. Semsey, R. Strohman, C. Tan, S. Saurabh, M. Bruchez, R.  
648 Schwartz, P. LeDuc, J. Torella, C. Boehm, F. Lienert, J. Chen, J. Way, P. Silver, L. Tran,  
649 M. Rizk, J. Liao, H. Tseng, K. Prather, F. Urnov, E. Rebar, M. Holmes, H. Zhang, P.  
650 Gregory, M. de Vos, F. Poelwijk, S. Tans, H. Wang, F. Isaacs, P. Carr, Z. Sun, G. Xu, C.  
651 Forest, G. Church, H. Wang, H. Kim, L. Cong, J. Jeong, D. Bang, G. Church, F. Wessely,  
652 M. Bartl, R. Guthke, P. Li, S. Schuster, C. Kaleta, D. Widmaier, D. Tullman-Ercek, E.  
653 Mirsky, R. Hill, S. Govindarajan, J. Minshull, C. Voigt, T. Xia, J. SantaLucia, M.

- 654 Burkard, R. Kierzek, S. Schroeder, X. Jiao, C. Cox, D. Turner, P. Xu, Q. Gu, W. Wang, L.  
655 Wong, A. Bower, C. Collins, M. Koffas, V. Yadav, M. De Mey, C. G. Lim, P. K.  
656 Ajikumar, G. Stephanopoulos, H. Yim, R. Haselbeck, W. Niu, C. Pujol-Baxley, A.  
657 Burgard, J. Boldt, J. Khandurina, J. Trawick, R. Osterhout, R. Stephen, J. Estadilla, S.  
658 Teisan, H. Schreyer, S. Andrae, T. Yang, S. Lee, M. Burk, S. Van Dien, L. Zelcbuch, N.  
659 Antonovsky, A. Bar-Even, A. Levin-Karp, U. Barenholz, M. Dayagi, W. Liebermeister,  
660 A. Flamholz, E. Noor, S. Amram, F. Zhang, J. Carothers, J. Keasling, J. Zhao, Q. Li, T.  
661 Sun, X. Zhu, H. Xu, J. Tang, X. Zhang, Y. Ma, Efficient search, mapping, and  
662 optimization of multi-protein genetic systems in diverse bacteria. *Mol. Syst. Biol.* **10**, 731  
663 (2014).
- 664 15. M. L. Rizk, J. C. Liao, Ensemble Modeling for Aromatic Production in Escherichia coli.  
665 *PLoS One.* **4**, e6903 (2009).
- 666 16. D. Visser, J. W. Schmid, K. Mauch, M. Reuss, J. J. Heijnen, Optimal re-design of primary  
667 metabolism in Escherichia coli using linlog kinetics. *Metab. Eng.* **6**, 378–390 (2004).
- 668 17. E. V. Nikolaev, The elucidation of metabolic pathways and their improvements using  
669 stable optimization of large-scale kinetic models of cellular systems. *Metab. Eng.* **12**, 26–  
670 38 (2010).
- 671 18. A. Khodayari, C. D. Maranas, A genome-scale Escherichia coli kinetic metabolic model  
672 k-ecoli457 satisfying flux data for multiple mutant strains. *Nat. Commun.* **7**, 13806 (2016).
- 673 19. S. Andreatti, L. Miskovic, V. Hatzimanikatis, ISCHRUNK - In Silico Approach to  
674 Characterization and Reduction of Uncertainty in the Kinetic Models of Genome-scale  
675 Metabolic Networks. *Metab. Eng.* **33**, 158–168 (2016).

- 676 20. L. Miskovic, V. Hatzimanikatis, Production of biofuels and biochemicals: In need of an  
677 ORACLE. *Trends Biotechnol.* **28**, 391–397 (2010).
- 678 21. JMP®, Version 14. SAS Institute Inc., Cary, NC, 1989-2007.
- 679 22. N. Roehner, E. M. Young, C. A. Voigt, D. B. Gordon, D. Densmore, Double Dutch: A  
680 Tool for Designing Combinatorial Libraries of Biological Systems. *ACS Synth. Biol.* **5**,  
681 507–517 (2016).
- 682 23. M. E. Lee, A. Aswani, A. S. Han, C. J. Tomlin, J. E. Dueber, Expression-level  
683 optimization of a multi-enzyme pathway in the absence of a high-throughput assay.  
684 *Nucleic Acids Res.* **41**, 10668–10678 (2013).
- 685 24. K. K. Sung, P. Niyogi, A Formulation for Active Learning with Applications to Object  
686 Detection (1996).
- 687 25. D. A. Cohn, Z. Ghahramani, M. I. Jordan, Active Learning with Statistical Models. *J.*  
688 *Artif. Intell. Res.* (1996) (available at <http://arxiv.org/abs/cs/9603104>).
- 689 26. B. Bryan, R. C. Nichol, C. R. Genovese, J. Schneider, C. J. Miller, L. Wasserman, Active  
690 Learning For Identifying Function Threshold Boundaries (2006), pp. 163–170.
- 691 27. M. V Burnašev, SEQUENTIAL DISCRIMINATION OF HYPOTHESES WITH  
692 CONTROL OF OBSERVATIONS. *Math. USSR-Izvestiya.* **15**, 419–440 (1980).
- 693 28. P. Awasthi, M. F. Balcan, P. M. Long, The Power of Localization for Efficiently Learning  
694 Linear Separators with Noise (2013) (available at <http://arxiv.org/abs/1307.8371>).
- 695 29. R. M. Castro, R. D. Nowak, in *Learning Theory* (Springer Berlin Heidelberg, Berlin,  
696 Heidelberg, 2007; [http://link.springer.com/10.1007/978-3-540-72927-3\\_3](http://link.springer.com/10.1007/978-3-540-72927-3_3)), pp. 5–19.

- 697 30. A. Singh, R. Nowak, P. Ramanathan, in *Proceedings of the fifth international conference*  
698 *on Information processing in sensor networks - IPSN '06* (ACM Press, New York, New  
699 York, USA, 2006; <http://portal.acm.org/citation.cfm?doid=1127777.1127790>), p. 60.
- 700 31. A. Espah Borujeni, A. S. Channarasappa, H. M. Salis, Translation rate is controlled by  
701 coupled trade-offs between site accessibility, selective RNA unfolding and sliding at  
702 upstream standby sites. *Nucleic Acids Res.* **42**, 2646–59 (2014).
- 703 32. H. M. Salis, E. A. Mirsky, C. A. Voigt, Automated design of synthetic ribosome binding  
704 sites to control protein expression. *Nat. Biotechnol.* **27**, 946–950 (2009).
- 705 33. M. Ikeda, (2003), pp. 1–35.
- 706 34. J. H. Park, T. Y. Kim, K. H. Lee, S. Y. Lee, Fed-batch culture of *Escherichia coli* for L-  
707 valine production based on in silico flux response analysis. *Biotechnol. Bioeng.* **108**, 934–  
708 946 (2011).
- 709 35. S. Bastian, X. Liu, J. T. Meyerowitz, C. D. Snow, M. M. Y. Chen, F. H. Arnold,  
710 Engineered ketol-acid reductoisomerase and alcohol dehydrogenase enable anaerobic 2-  
711 methylpropan-1-ol production at theoretical yield in *Escherichia coli*. *Metab. Eng.* **13**,  
712 345–352 (2011).
- 713 36. A. Ben-Hur, J. Weston, *A User's Guide to Support Vector Machines*.
- 714 37. P. Auer, “Using Confidence Bounds for Exploitation-Exploration Trade-offs” (2002),  
715 (available at <http://www.jmlr.org/papers/volume3/auer02a/auer02a.pdf>).
- 716 38. J. H. Park, K. H. Lee, T. Y. Kim, S. Y. Lee, Metabolic engineering of *Escherichia coli* for  
717 the production of L-valine based on transcriptome analysis and in silico gene knockout

- 718 simulation. *Proc. Natl. Acad. Sci. U. S. A.* **104**, 7797–7802 (2007).
- 719 39. E. Amann, B. Ochs, K.-J. Abel, Tightly regulated tac promoter vectors useful for the  
720 expression of unfused and fused proteins in *Escherichia coli*. *Gene*. **69**, 301–315 (1988).
- 721 40. J. T. Youngquist, M. H. Schumacher, J. P. Rose, T. C. Raines, M. C. Politz, M. F.  
722 Copeland, B. F. Pfeleger, Production of medium chain length fatty alcohols from glucose in  
723 *Escherichia coli*. *Metab. Eng.* **20**, 177–86 (2013).
- 724 41. S. Kosuri, D. B. Goodman, G. Cambray, V. K. Mutalik, Y. Gao, A. P. Arkin, D. Endy, G.  
725 M. Church, Composability of regulatory sequences controlling transcription and  
726 translation in *Escherichia coli*. *Proc. Natl. Acad. Sci. U. S. A.* **110**, 14024–9 (2013).
- 727 42. F. C. Neidhardt, P. L. Bloch, D. F. Smith, Culture medium for enterobacteria. *J. Bacteriol.*  
728 **119**, 736–747 (1974).
- 729 43. J. Sambrook, E. F. Fritsch, T. Maniatis, *Molecular Cloning: A Laboratory Manual* (Cold  
730 Spring Harbor Laboratory Press, 1989), *Molecular Cloning: A Laboratory Manual*.
- 731 44. C. P. Long, M. R. Antoniewicz, Quantifying biomass composition by gas  
732 chromatography/mass spectrometry. *Anal. Chem.* **86**, 9423–7 (2014).
- 733 45. M. R. Antoniewicz, J. K. Kelleher, G. Stephanopoulos, Accurate Assessment of Amino  
734 Acid Mass Isotopomer Distributions for Metabolic Flux Analysis. *Anal. Chem.* **79**, 7554–  
735 7559 (2007).
- 736 46. P. Millard, F. Letisse, S. Sokol, J.-C. Portais, IsoCor: correcting MS data in isotope  
737 labeling experiments. *Bioinformatics*. **28**, 1294–1296 (2012).
- 738 47. J. D. Orth, I. Thiele, B. Ø. Palsson, What is flux balance analysis? *Nat. Biotechnol.* **28**,



739 245–8 (2010).

740 48. J. L. Reed, T. D. Vo, C. H. Schilling, B. O. Palsson, An expanded genome-scale model of

741 Escherichia coli K-12 (iJR904 GSM/GPR). *Genome Biol.* **4**, R54 (2003).

742

743

744 **FIGURE CAPTIONS**

745

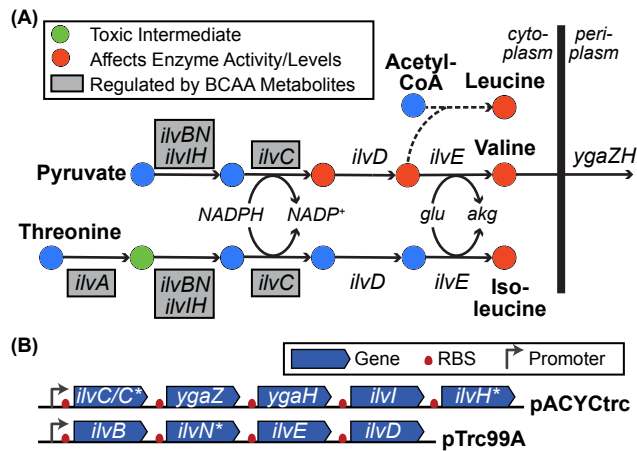

746

747 **Figure 1: Biosynthesis pathway for branched chain amino acids in *E. coli*.** There are nine  
 748 genes involved in valine export and biosynthesis from pyruvate. The dashed arrow indicates the  
 749 need of multiple reactions to convert acetyl-CoA and 3-methyl-2-oxobutanoate to leucine.  
 750 Metabolites that regulate branched chain amino acid biosynthesis enzyme activity or levels are  
 751 shown in red. Metabolites that are toxic are shown in green. Enzymes that are regulated by  
 752 branched chain amino acid metabolites are boxed in grey.

753

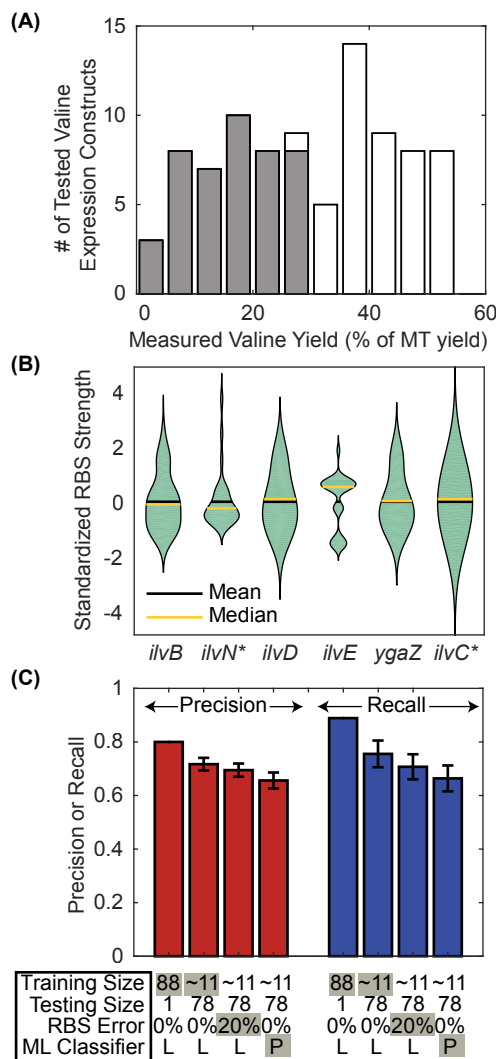

754  
755  
756  
757  
758  
759  
760  
761  
762  
763  
764  
765  
766  
767  
768  
769

**Figure 2: Machine learning approaches applied to the valine experimental dataset.** Panel (A) shows a histogram of the valine yield in all 89 experiments and whether they were classified as high (white bars, 46 experiments) or low (grey bars, 45 experiments) yield. (B) Shows a violin plot (where the outer shape width is proportional to frequency of occurrence and the black and yellow bars indicates the mean and median values, respectively) of the standardized RBS strengths (see Methods for details) for each gene whose RBS varied across the experiments. The precision and recall are shown in panel (C) for four different cases with different training (and testing) set sizes, added RBS strength errors, and with linear (Lin.) or non-linear (Non-Lin.) classifiers. Precision (red bars) is the ratio of true positives (i.e., correctly predicted high yield experiments) to the total predicted positives (i.e., total predicted high yield experiments), whereas, recall (blue bars) is the ratio of true positives to the total actual positives (i.e., total actual high yield experiments). The bar represents the average and the error bars show the standard deviation across 1,000 inverse eight-fold cross-validations.

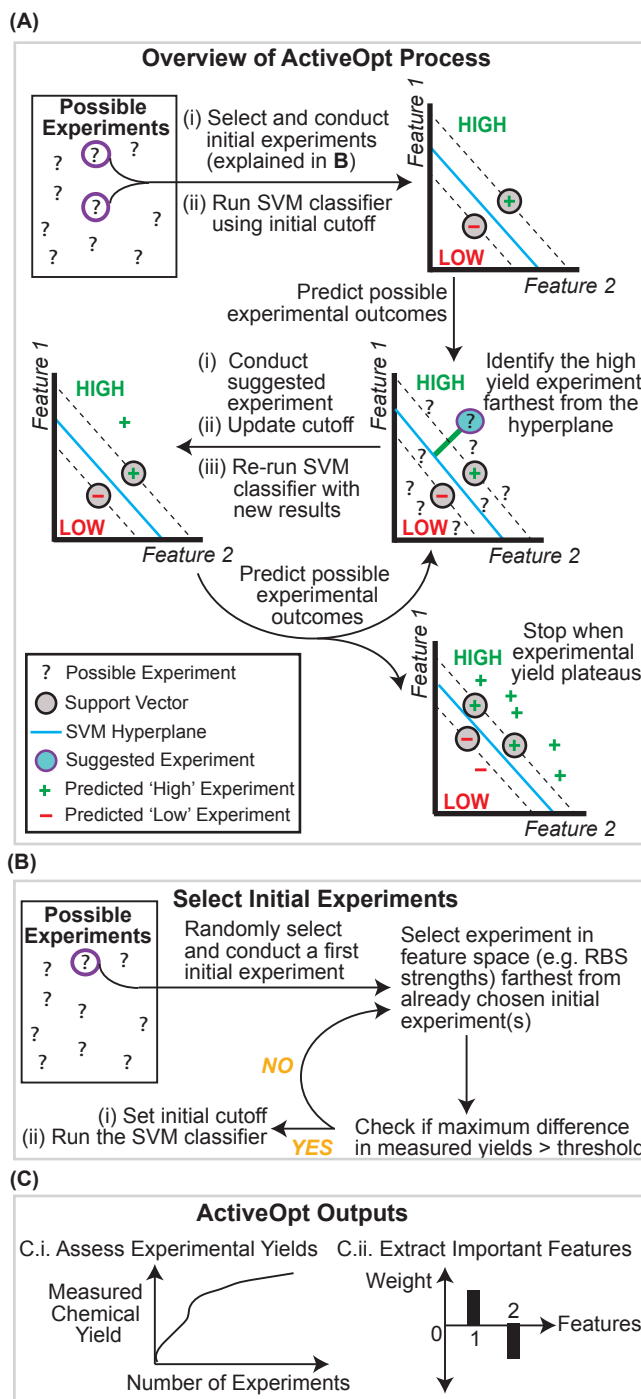

770  
771  
772  
773  
774  
775  
776  
777

**Figure 3: Overview and Output of ActiveOpt.** Panel (A) shows a Flowchart of the **ActiveOpt** method. Panel (B) shows the process for selecting the initial set of experiments on which the classifier is initially run. Panel (C) shows possible outputs generated by **ActiveOpt**, such as: maximum product yield found versus number of experiments performed or identification of important features affecting product yield.

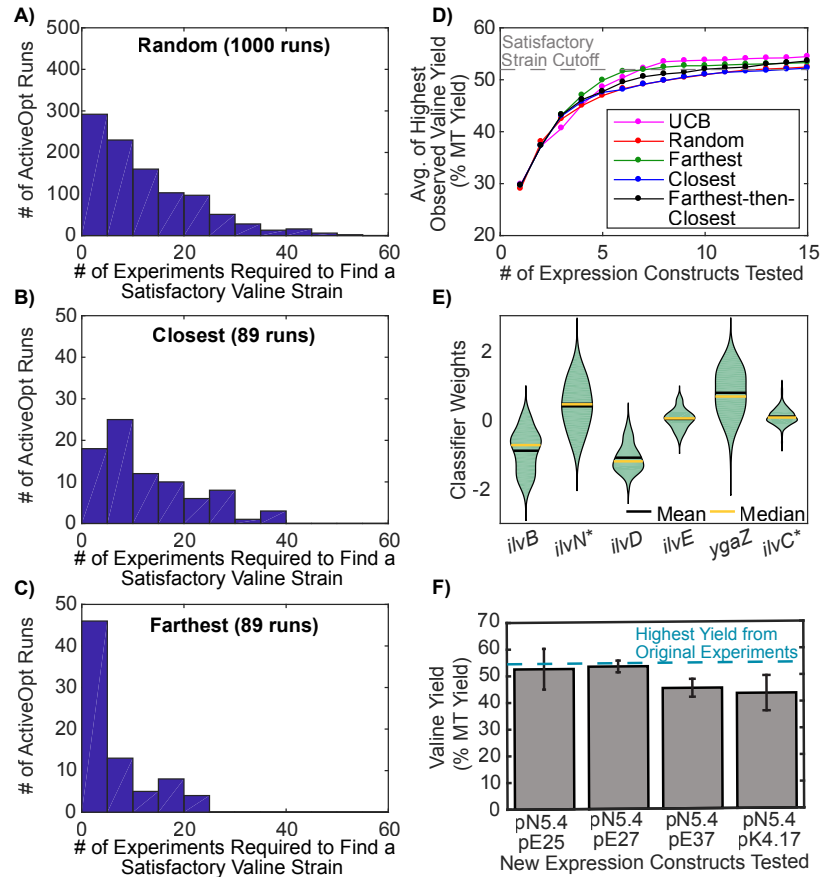

778  
779

780 **Figure 4: ActiveOpt Applied to Enhance Valine Yield.** Panels (A-C) show histograms for the  
781 number of total experiments needed by ActiveOpt to identify a satisfactory strain (i.e., a strain  
782 with a yield >95% of the highest observed valine yield across all experiments) using different  
783 “next experiment” selection approaches when 89 different first initial experiments were used to  
784 start the algorithm. Panel (A) used random selection. Closest-to-the-hyperplane was used in panel  
785 (B), and farthest-from-the-hyperplane in panel (C). In panel (D), the average from the 89  
786 ActiveOpt or UCB runs of the highest observed % valine yield is plotted as a function of the  
787 number of total experiments performed. Panel (E) shows the distribution (using violin plots where  
788 the outer shape width is proportional to frequency of occurrence and the bar indicates the average  
789 value) of the feature weights from the final classifiers generated from the 89 ActiveOpt runs using  
790 the farthest-from-the-hyperplane experimental selection approach. An SVM classifier was built  
791 from the original 89 experiments and used by ActiveOpt to identify four new experiments (not  
792 included in the original 89 experiments) that were farthest from the classifier’s hyperplane. In all  
793 four new experiments the valine yields were high (panel F) as predicted by ActiveOpt.

794

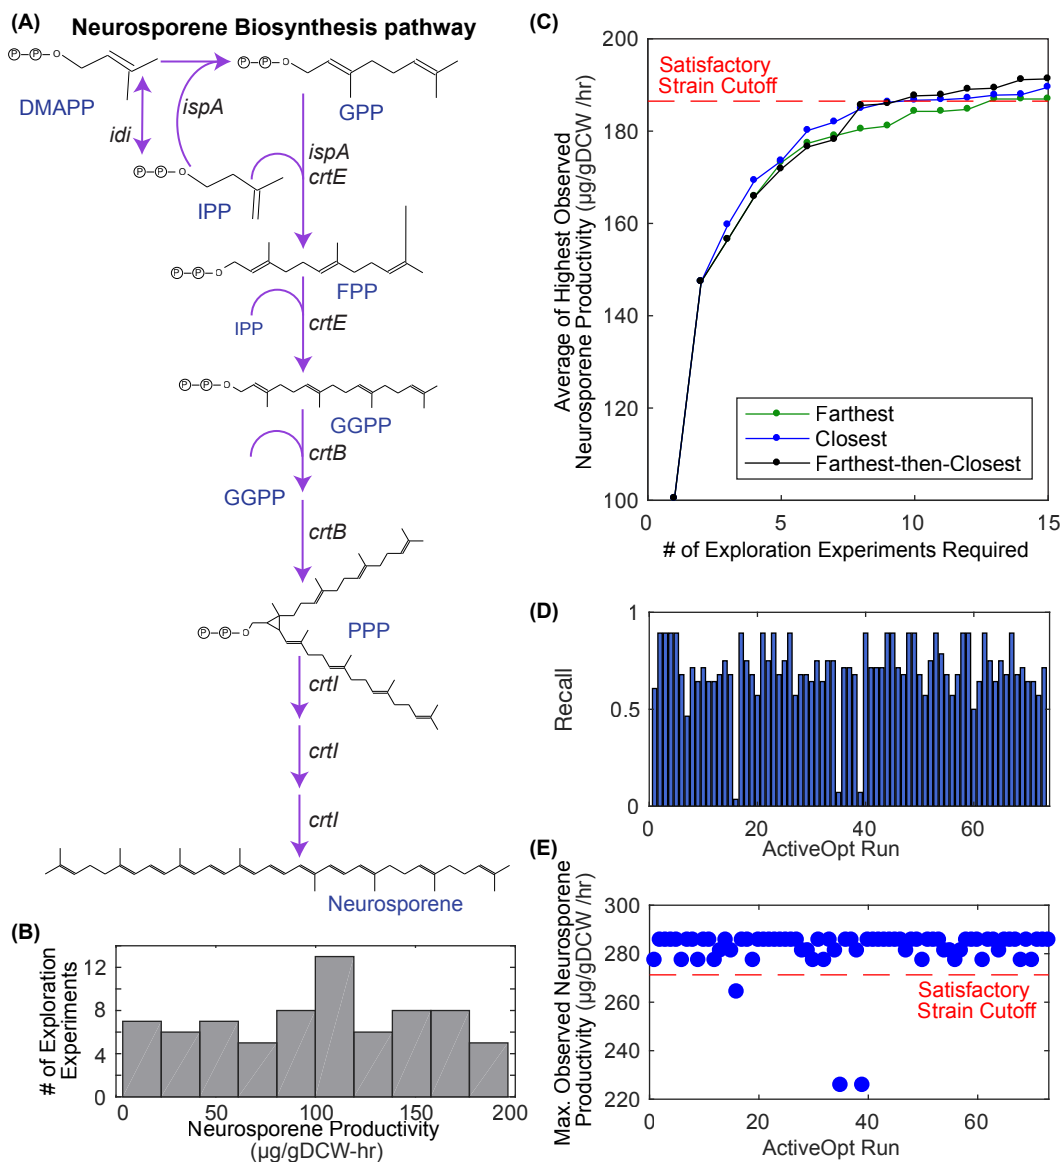

795  
 796 **Figure 5: ActiveOpt Applied to Enhance Neurosporene Productivity.** Panel (A) shows the  
 797 neurosporene biosynthesis pathway. Panel (B) shows the neurosporene productivity measured by  
 798 Farasat et al. in the exploration experiments. Panel (C) shows the average of the maximum  
 799 observed neurosporene productivity found across the 73 ActiveOpt runs using different approaches  
 800 for finding the next experiment (farthest-from-the-hyperplane = green, closest-to-the-hyperplane  
 801 = blue, and farthest-then-closest-to-the-hyperplane = black). Panel (D) shows for each of the 73  
 802 final extrapolation ActiveOpt cutoffs and classifiers (using first exploration then extrapolation  
 803 experiments) what the recall was for the extrapolation experiments (using new RBSs not tested in  
 804 the exploration experiments). Panel (E) shows for each ActiveOpt run (using first exploration then  
 805 extrapolation experiments) with the farthest-from-the-hyperplane approach what the maximum  
 806 observed neurosporene productivity would have been across selected extrapolation experiments.

807  
 808  
 809 **Table 1:** Feature weights from Logistic Regression, ActiveOpt (using farthest-from-the-  
 810 hyperplane approach), and UCB.

| <b>RBS Strength for Gene</b> | <b>Logistic Regression Coefficients (p-values)</b> | <b>Average ActiveOpt (w/Furthest)Weights</b> |
|------------------------------|----------------------------------------------------|----------------------------------------------|
| <i>ilvB</i>                  | -2.38 (0.017)                                      | -0.90                                        |
| <i>ilvN*</i>                 | 3.50 (0.023)                                       | 0.42                                         |
| <i>ilvD</i>                  | -4.03(0.001)                                       | -1.10                                        |
| <i>ilvE</i>                  | 0.43 (0.490)                                       | 0.02                                         |
| <i>ygaZ</i>                  | 0.16 (0.700)                                       | 0.77                                         |
| <i>ilvC*</i>                 | 0.27 (0.545)                                       | 0.09                                         |

811

812

813

814

815 **SUPPLEMENTARY INFORMATION**

816

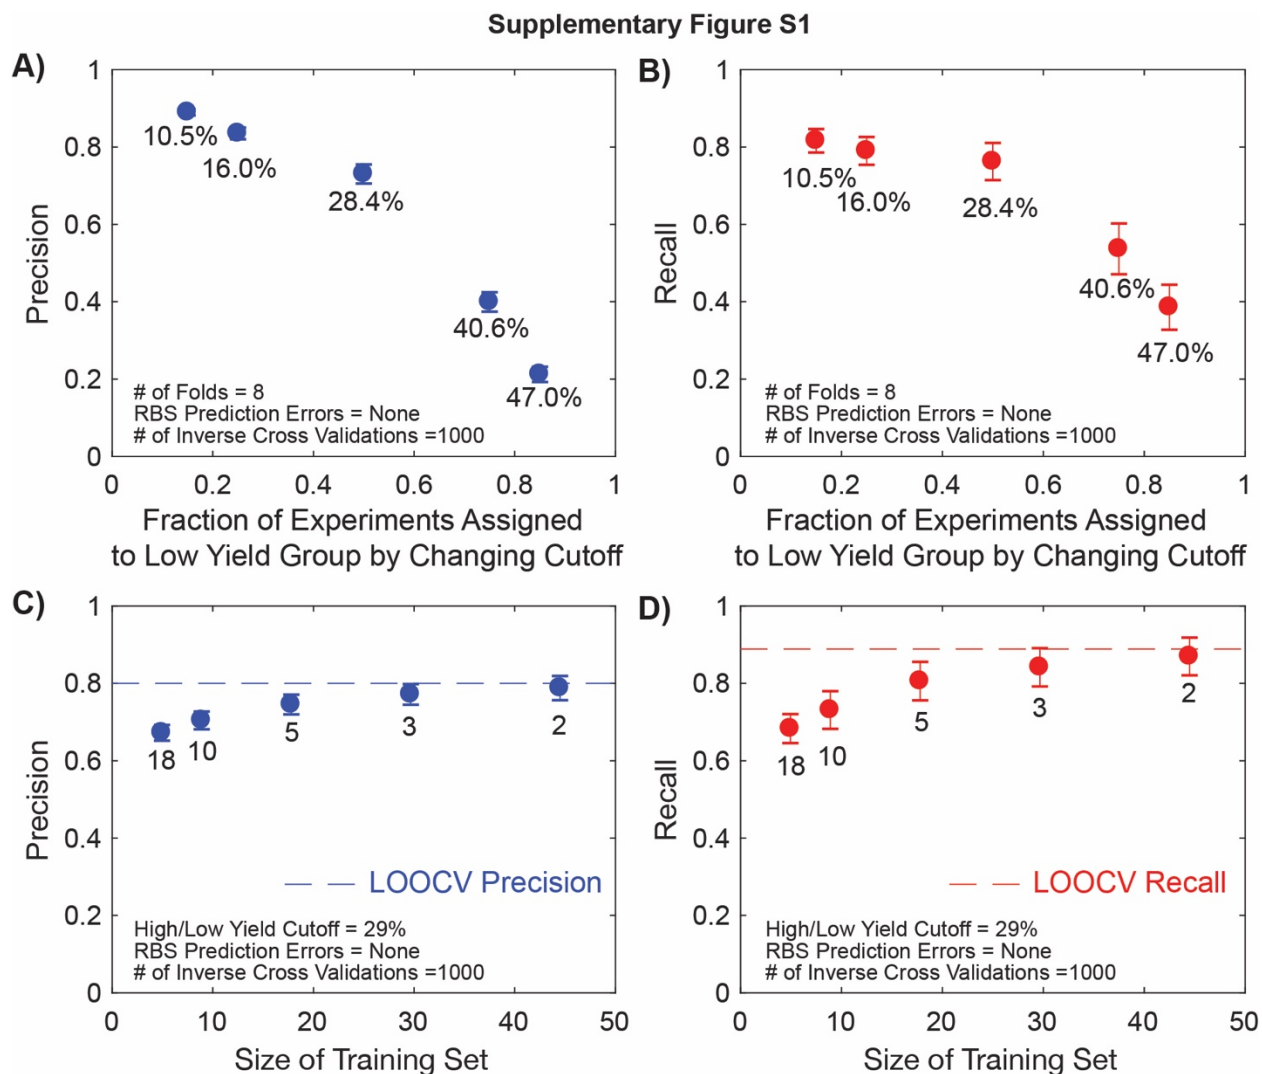

817

818 **Supplementary Figure S1: Sensitivity of the SVM Classifier to High/Low Cutoffs and**

819 **Training Set Size.** A cutoff was used to assign the valine experiments to one of two groups, either

820 a high yield experiment or a low yield experiment. Panels (A) and (B) shows the sensitivity of the

821 SVM classifier's precision and recall, respectively, to the cutoff used to assign experiments to

822 different groups. The cutoffs were varied so that 15%, 25%, 50%, 75%, or 85% of all the

823 experiments were assigned to the low yield experiment group. Results in (A) and (B) were

824 generated by taking the average and standard deviation (error bars) of 1,000 inverse eight-fold

825 cross-validations assuming no errors in the predicted RBS strengths. Panels (C) and (D) shows the

826 sensitivity of the SVM classifier's precision and recall, respectively, to the number of experiments



827 included in the training dataset (by varying the number of folds used in the inverse cross-  
828 validation). The number of folds were varied (18, 10, 5, 3, and 2) so that the size of the training  
829 datasets were around ~5, ~9, ~18, ~30, and ~45. Numbers below each point indicate cutoff (% MT  
830 Yield) used to generate each result. Results in (C) and (D) were generated by taking the average  
831 and standard deviation (error bars) of 1,000 inverse fold cross-validations using a yield cutoff of  
832 29% MT yield (to assign experiments to separate groups) and assuming no errors in the predicted  
833 RBS strengths. The dashed lines in panels (C) and (D) show the precision and recall values from  
834 the LOOCV analysis (with a training set size of 90). Numbers below each point indicate number  
835 of folds used to generate each result.

## Supplementary Figure S2

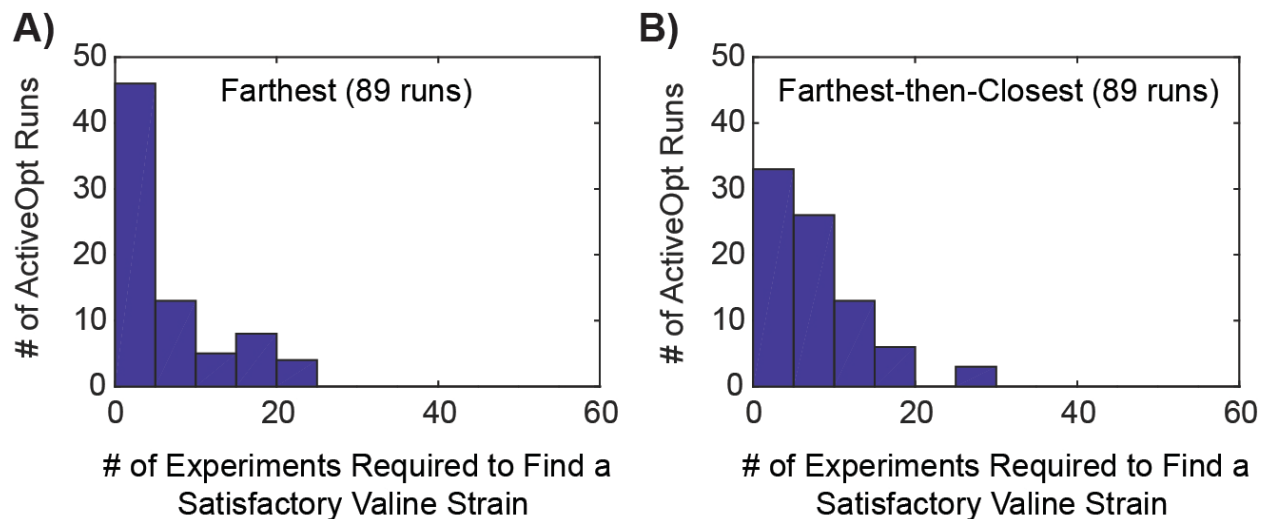

836

837 **Supplementary Figure S2: Number of Valine Experiments Needed to Find a Satisfactory**  
838 **Valine Strain.** The figure shows histograms of the number of experiments needed to find a  
839 satisfactory valine strain for 89 different ActiveOpt runs (using each valine experiment as a first  
840 initial experiment) using either the farthest-from-the-hyperplane (Panel A) and farthest-then-  
841 closest-to-the-hyperplane (Panel B) approach. Panel A is the same as that shown in Figure 4C and

842 is repeated for comparative purposes.

## Supplementary Figure S3

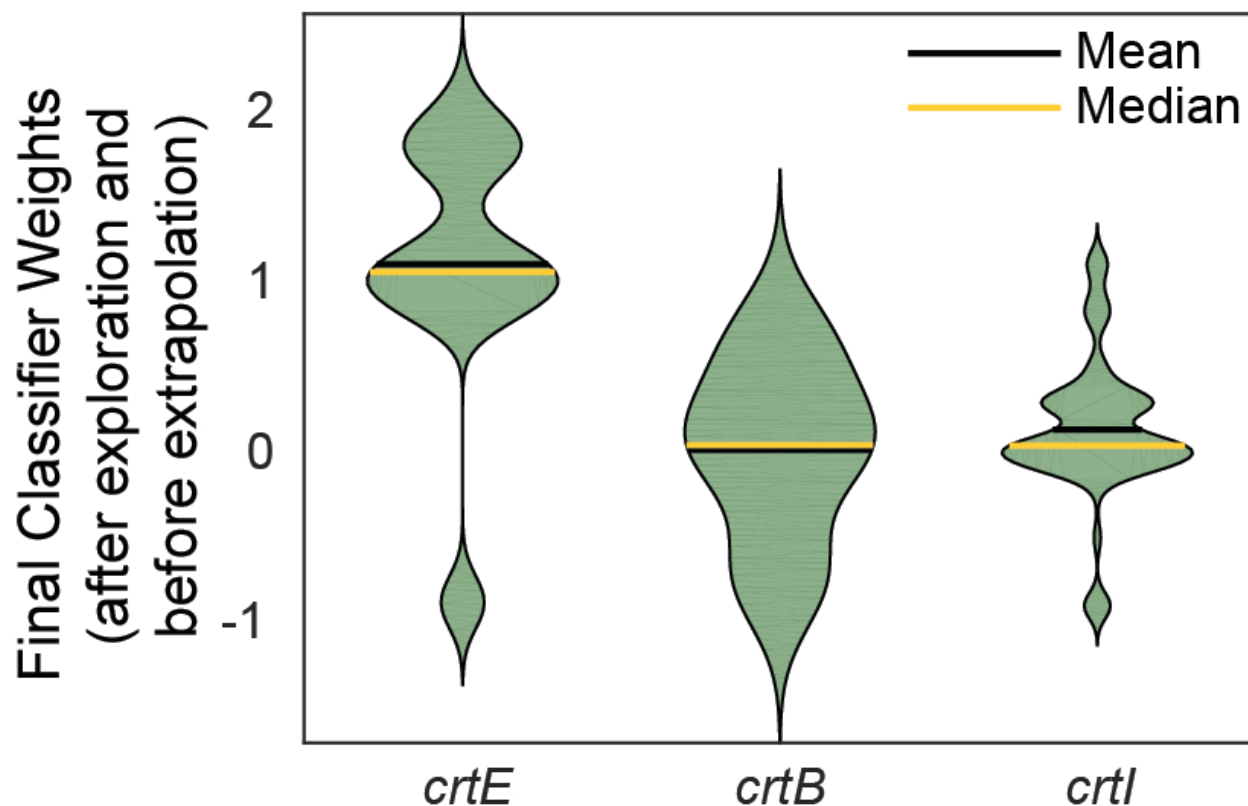

843

844 **Supplementary Figure S3: Distribution of Feature Weights for Final ActiveOpt Classifiers.**

845 This figure shows a violin plot (where the outer shape width is proportional to frequency of  
846 occurrence and the black and red bars indicates the mean and median values, respectively) for the  
847 distribution of weights for the three features (standardized RBS strengths for *crtE*, *crtB*, and *crtI*)  
848 across the final 73 ActiveOpt classifiers generated using the farthest-from-the-hyperplane  
849 approach. Each ActiveOpt run was generated using a different exploration experiment (the first 73  
850 experiments reported by Farasat et al.) as a first initial experiment. The final classifier is when no  
851 more remaining experiments are predicted to be high yield.

### Supplementary Figure S4

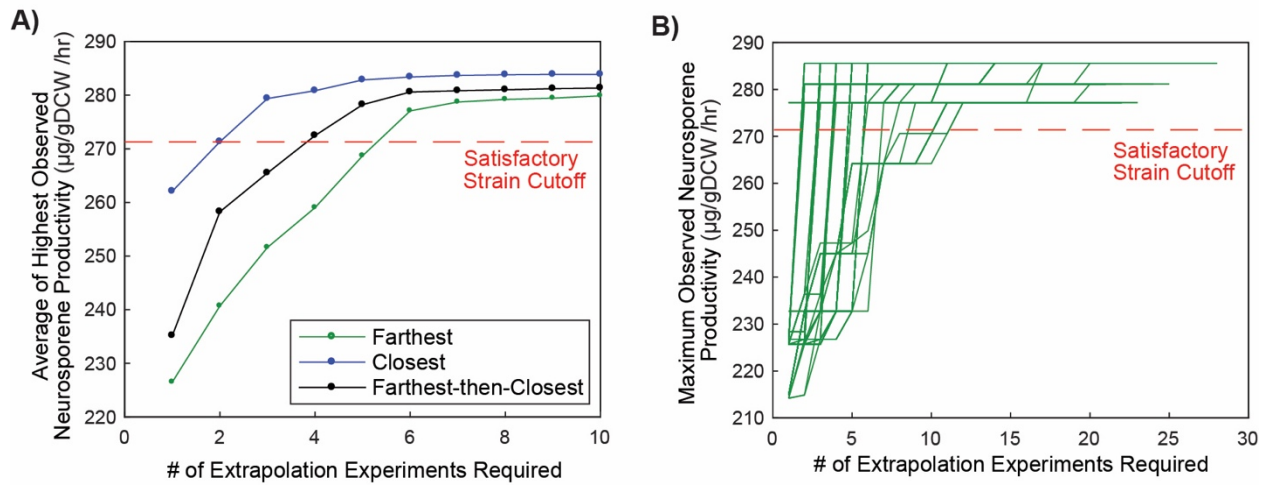

852

853 **Supplementary Figure S4: ActiveOpt Applied to Extrapolation Experiments from the**

854 **Neurosporene Productivity Case Study.** Panel (A) shows for different ActiveOpt next

855 experiment selection approaches, the average from the 73 ActiveOpt runs of the highest observed

856 neurosporene productivity as a function of the number of extrapolation experiments performed.

857 The closest-to-the-hyperplane is shown in blue, the farthest-from-the-hyperplane is shown in

858 green, and farthest-then-closest-to-the-hyperplane is shown in black. Panel (B) shows how the

859 highest observed neurosporene productivity varies as a function of the number of extrapolation

860 experiments performed using the farthest-from-the-hyperplane approach. Each of the 73 curves

861 was generated by ActiveOpt starting from the final classifiers generated by ActiveOpt using the

862 exploration experiments.

863

864

865 **Supplementary Table S1.** Plasmids and strains used in valine experiments. See Supplementary  
866 excel file.

867 **Supplementary Table S2.** Measured valine yields using different combinations of plasmids in  
868 PYR003a. See Supplementary excel file.

869 **Supplementary Table S3.** Performance of different techniques to select the next ActiveOpt  
870 experiment on the valine dataset.

871

|                                                                                      | Random          | Closest-to-the-Hyperplane | Farthest-from-the-Hyperplane | Farthest-then-Closest-to-the-Hyperplane |
|--------------------------------------------------------------------------------------|-----------------|---------------------------|------------------------------|-----------------------------------------|
| # of ActiveOpt runs                                                                  | 1000            | 89                        | 89                           | 89                                      |
| # of ActiveOpt runs that found a satisfactory strain <sup>a</sup>                    | 1000            | 83                        | 76                           | 81                                      |
| # of experiments to find a satisfactory strain <sup>b</sup>                          | 13              | 14                        | 8                            | 10                                      |
| # of ActiveOpt runs that found a satisfactory strain in <10 experiments <sup>c</sup> | 475             | 41                        | 59                           | 55                                      |
| average # of expts until no predicted high yield experiments remain <sup>d</sup>     | NA <sup>g</sup> | 54.0                      | 24.3                         | 38.6                                    |
| Average precision <sup>e</sup>                                                       | NA <sup>g</sup> | 0.91                      | 0.95                         | 0.92                                    |
| Average recall <sup>f</sup>                                                          | NA <sup>g</sup> | 0.69                      | 0.35                         | 0.54                                    |

872 <sup>a</sup> Each run was started from a different first initial experiment

873 <sup>b</sup> The total number of experiments needed for the average (across all 89 runs) highest observed valine  
874 yield to exceed 95% of the measured maximum yield

875 <sup>c</sup> The number of runs that found a strain in less than 10 total experiments which had at least 95% of the  
876 measured maximum yield

877 <sup>d</sup> The average number of experiments suggested by ActiveOpt to be performed until no additional  
878 experiments are predicted to have high yield (i.e., the number of experiments needed to generate the final  
879 ActiveOpt classifiers)

880 <sup>e</sup> The average precision (across all 89 runs) for the final ActiveOpt classifiers when predictions were  
881 made for all 89 experiments

882 <sup>f</sup> The average recall (across all 89 runs) for the final ActiveOpt classifiers when predictions were made for  
883 all 89 experiments

884 <sup>g</sup> NA indicates not applicable since no classifier is generated using the random experiment selection  
885 approach.

886

887

888

889 **Supplementary Table S4.** Performance of different techniques to select the next ActiveOpt  
 890 experiment on the neurosporene dataset. In grey are results from the exploration experiments and  
 891 in white the extrapolation experiments.  
 892

|                                                                                                 | Random          | Closest-to-the-Hyperplane | Farthest-from-the-Hyperplane | Farthest-then-Closest-to-the-Hyperplane |
|-------------------------------------------------------------------------------------------------|-----------------|---------------------------|------------------------------|-----------------------------------------|
| # of ActiveOpt runs                                                                             | 1000            | 73                        | 73                           | 73                                      |
| # of ActiveOpt runs that found a satisfactory strain <sup>a</sup>                               | 1000            | 71                        | 64                           | 73                                      |
| # of expts to find a satisfactory strain <sup>b</sup>                                           | 19              | 10                        | 13                           | 10                                      |
| average # of exploration expts until no predicted high productivity expts remain <sup>c</sup>   | NA <sup>j</sup> | 29.2                      | 17.0                         | 23.4                                    |
| Average precision <sup>d</sup>                                                                  | NA <sup>j</sup> | 0.83                      | 0.83                         | 0.84                                    |
| Average recall <sup>e</sup>                                                                     | NA <sup>j</sup> | 0.44                      | 0.27                         | 0.40                                    |
| # of ActiveOpt runs that found a satisfactory strain <sup>f</sup>                               | 1000            | 73                        | 70                           | 71                                      |
| # of expts to find a satisfactory strain <sup>g</sup>                                           | 7               | 2                         | 6                            | 4                                       |
| average # of extrapolation expts until no predicted high productivity expts remain <sup>h</sup> | NA <sup>j</sup> | 16.2                      | 21.7                         | 18.8                                    |
| Average recall <sup>i</sup>                                                                     | NA <sup>j</sup> | 0.47                      | 0.70                         | 0.54                                    |

893 <sup>a</sup> Each run was started from a different first initial experiment in the exploration dataset. A satisfactory  
 894 strain had at least 95% of the measured maximum productivity across the 73 exploration experiments.

895 <sup>b</sup> The total number of experiments needed for the average (across all 73 runs) highest observed valine  
 896 yield to exceed 95% of the measured maximum productivity in the 73 exploration experiments.

897 <sup>c</sup> The average number of exploratory experiments suggested by ActiveOpt to be performed until no  
 898 additional exploratory experiments are predicted to have high productivity (i.e., the number of  
 899 experiments needed to generate the final exploration ActiveOpt classifiers)

900 <sup>d</sup> The average precision (across all 73 runs) for the exploration experiments from the final ActiveOpt  
 901 classifiers after using exploration experiments. Predictions were made for all 73 experiments and used to  
 902 calculate precision for each classifier.

903 <sup>e</sup> The average recall (across all 73 runs) for the exploration experiments from the final ActiveOpt  
 904 classifiers after using exploration experiments. Predictions were made for all 73 experiments and used to  
 905 calculate recall for each classifier.

906 <sup>f</sup> Each run was started from a different first initial experiment in the exploration dataset. Once no more  
907 predicted high productivity exploration experiments were available, ActiveOpt was allowed to select high  
908 productivity extrapolation experiments. A satisfactory strain had at least 95% of the measured maximum  
909 productivity across the 28 extrapolation experiments.

910 <sup>g</sup> The total number of experiments needed for the average (across all 73 runs) highest observed valine  
911 yield to exceed 95% of the measured maximum productivity in the 73 extrapolation experiments

912 <sup>h</sup> The average number of extrapolation experiments suggested by ActiveOpt to be performed until no  
913 additional extrapolation experiments are predicted to have high productivity (i.e., the number of  
914 experiments needed to generate the final extrapolation ActiveOpt classifiers)

915 <sup>i</sup> The average recall (across all 73 runs) for the extrapolation experiments from the final ActiveOpt  
916 classifiers after using extrapolation experiments. Predictions were made for all 28 experiments and used  
917 to calculate recall for each classifier. The precision was 1 for all classifiers since all extrapolation  
918 experiments were high productivity.

919 <sup>j</sup> NA indicates not applicable since no classifier is generated using the random experiment selection  
920 approach.

921

922 **Supplementary Table S5.** Average weights across final ActiveOpt classifiers generated from  
923 the 73 neurosporene exploration experiments, with each experiment chosen as a first initial  
924 experiment.

925

| <b>Next Experiment Selection Approach</b> | <i>crtE</i> | <i>crtB</i> | <i>crtI</i> |
|-------------------------------------------|-------------|-------------|-------------|
| closest-to-the-hyperplane                 | 0.98        | -0.04       | 0.11        |
| farthest-from-the-hyperplane              | 1.07        | -0.03       | 0.09        |
| farthest-then-closest-to-the-hyperplane   | 0.96        | 0.03        | 0.07        |

926

927

928

929

930

931

932

933

934

935

936

937

938

939

940

941
